# Supplementary material for: What Is Digital Parenting? A Systematic Review of Past Measurement and Blueprint for the Future
Source: PubMed Central journal article supplement — Perspect Psychol Sci. 2022 Jul 11;17(6):1673–91. doi: 10.1177/17456916211072458 (PMC9634335; doi:10.1177/17456916211072458), 2022-07-11

**Section 1. Search Strategies**

Databases

Ovid Medline, Web of Science, PsycINFO, the Educational Resources Information Centre (ERIC), Proquest Dissertations and Theses, and ACM Digital Library

Limits

Year: 2008 forward

Publication type: Peer-reviewed journal article, dissertation/thesis, conference paper / proceedings, book, or book chapter

Language: English

Search Parameters

Ovid Medline:

(exp Internet/ OR exp Cell Phone/ OR computer mediated communication\*.ti,ab. OR Social Media.ti,ab. OR Internet.ti,ab. OR SNS.ti,ab. OR social networking site\*.ti,ab. OR Social network site\*.ti,ab. OR cyber.ti,ab. OR online.ti,ab. OR Cell phone.ti,ab. OR Cell phones.ti,ab. OR mobile phone.ti,ab. OR Mobile phones.ti,ab. OR Digital.ti,ab. OR Smartphone.ti,ab. OR Smartphones.ti,ab. OR GPS.ti,ab. OR Digital media.ti,ab. OR CMC.ti,ab.)

AND

(exp Adolescent/ OR exp Child/ OR Adolescent.ti,ab. OR Adolescents.ti,ab. OR Juvenile.ti,ab. OR Juveniles.ti,ab. OR Teen.ti,ab. OR Teens.ti,ab. OR Teenagers.ti,ab. OR Youth.ti,ab. OR Child.ti,ab. OR Children.ti,ab. OR Childrens.ti,ab.)

AND

((Parenting OR Parent OR Parental OR Family) adj3 (Mediation OR Restriction OR Monitoring OR Involvement OR Support OR Rules OR Supervision OR Limit OR Control)).ti,ab.

Web of Science:

(Internet OR "Cell Phone" OR "computer mediated communication\*" OR "Social Media" OR Internet OR SNS OR "social networking site\*" OR "Social network site\*" OR cyber OR online OR "Cell phone" OR "Cell phones" OR "mobile phone" OR "Mobile phones" OR Digital OR Smartphone OR Smartphones OR GPS OR "Digital media" OR CMC)

AND

(Adolescent OR Child OR Adolescent OR Adolescents OR Juvenile OR Juveniles OR Teen OR Teens OR Teenagers OR Youth OR Child OR Children OR Childrens)

AND

((Parenting OR Parent OR Parental OR Family) NEAR/3 (Mediation OR Restriction OR Monitoring OR Involvement OR Support OR Rules OR Supervision OR Limit OR Control))

PsycINFO:

(Internet OR "Cell Phone" OR computer mediated communication\*.ti,ab OR Social Media.ti,ab OR Internet.ti,ab OR SNS.ti,ab OR social networking site\*.ti,ab OR Social network site\*.ti,ab OR cyber.ti,ab OR online.ti,ab OR Cell phone.ti,ab OR Cell phones.ti,ab OR mobile phone.ti,ab OR Mobile phones.ti,ab OR Digital.ti,ab OR Smartphone.ti,ab OR Smartphones.ti,ab OR GPS.ti,ab OR Digital media.ti,ab OR CMC.ti,ab)

AND

(Adolescent OR Child OR Adolescent.ti,ab OR Adolescents.ti,ab OR Juvenile.ti,ab OR Juveniles.ti,ab OR Teen.ti,ab OR Teens.ti,ab OR Teenagers.ti,ab OR Youth.ti,ab OR Child.ti,ab OR Children.ti,ab OR Childrens.ti,ab)

AND

((Parenting.ti,ab OR Parent.ti,ab OR Parental.ti,ab OR Family.ti,ab) ADJ3 (Mediation.ti,ab OR Restriction.ti,ab OR Monitoring.ti,ab OR Involvement.ti,ab OR Support.ti,ab OR Rules.ti,ab OR Supervision.ti,ab OR Limit.ti,ab OR Control.ti,ab))

Educational Resources Information Centre (ERIC):

(Internet OR "Cell Phone" OR "computer mediated communication\*" OR "Social Media" OR Internet OR SNS OR "social networking site\*" OR "Social network site\*" OR cyber OR online OR "Cell phone" OR "Cell phones" OR "mobile phone" OR "Mobile phones" OR Digital OR Smartphone OR Smartphones OR GPS OR "Digital media" OR CMC)

AND

(Adolescent OR Child OR Adolescent OR Adolescents OR Juvenile OR Juveniles OR Teen OR Teens OR Teenagers OR Youth OR Child OR Children OR Childrens)

AND

(Parenting OR Parent OR Parental OR Family)

AND

(Mediation OR Restriction OR Monitoring OR Involvement OR Support OR Rules OR Supervision OR Limit OR Control)

Proquest Dissertations and Theses:

(Internet OR "Cell Phone" OR "computer mediated communication\*" OR "Social Media" OR Internet OR SNS OR "social networking site\*" OR "Social network site\*" OR cyber OR online OR "Cell phone" OR "Cell phones" OR "mobile phone" OR "Mobile phones" OR Digital OR Smartphone OR Smartphones OR GPS OR "Digital media" OR CMC)

AND

(Adolescent OR Child OR Adolescent OR Adolescents OR Juvenile OR Juveniles OR Teen OR Teens OR Teenagers OR Youth OR Child OR Children OR Childrens)

AND

(Parenting OR Parent OR Parental OR Family)

AND

(Mediation OR Restriction OR Monitoring OR Involvement OR Support OR Rules OR Supervision OR Limit OR Control)

ACM Digital Library (\*Include SIGCHI conferences\*):

(Internet OR "Cell Phone" OR "computer mediated communication\*" OR "Social Media" OR Internet OR SNS OR "social networking site\*" OR "Social network site\*" OR cyber OR online OR "Cell phone" OR "Cell phones" OR "mobile phone" OR "Mobile phones" OR Digital OR Smartphone OR Smartphones OR GPS OR "Digital media" OR CMC)

AND

(Adolescent OR Child OR Adolescent OR Adolescents OR Juvenile OR Juveniles OR Teen OR Teens OR Teenagers OR Youth OR Child OR Children OR Childrens)

AND

(Parenting OR Parent OR Parental OR Family)

AND

(Mediation OR Restriction OR Monitoring OR Involvement OR Support OR Rules OR Supervision OR Limit OR Control)

**Section 2.** Definitions of themes emerging from qualitative studies and associated frequencies (number of papers with at least one instance of a given theme, not mutually exclusive).

**1. Restriction and Rule Setting**

- **Rule Setting:** (N=47) Parents setting rules, such as screen time limits but without actively enforcing these limits with tech. This sometimes happened as a result of balancing technology use with other activities, such as homework and extracurricular activities.
- **Reward/Punishment:** (N=42) Parents noting that tech is used as a reward or taken away as a punishment. Often parents leverage material/financial support to control usage.
- **Tech Restriction:** (N=34) Parents limiting the use of technology through by restricting features within that technology. e.g., locking down features
- **Physical Restriction:** (N=25) Restricting physical access to the device or defining appropriate use based on the device
- **Peer Restriction:** (N=10) restricting access to peers based on peers' tech use or what they post/have access to tech wise; friending peers to keep track; changing rules based on peer presence

**2. Parental Monitoring**

- **Active:** (N =27) Monitoring on an on-going basis, such as friending your child on Facebook (though limited view). Social media stalking
- **Intermittent:** (N=24) Parents getting access to the device on-demand to review activities
- **Technological:** (N=9) Using parental control apps and other technologies for monitoring.
- **Privacy and Trust:** (N = 24) Negotiating between trusting the child versus respecting their privacy

**3. Parental Mediation**

- **Active:** (N=57) Consistently keeping the lines of communication open/providing support. Teaching and giving guidelines and working to help a child learn how to be a “decent individual involving technology use” Being actively involved in your child's online life.
- **Intermittent:** (N =32) When parents passively tell their children advice, like "You should go to bed," to mediate tech use. More reactive than active.
- **Parenting by Example:** (N=21) The idea that parents should model healthy tech use for their children to teach them healthy tech use. Often this points out how parents over-use tech as well.

**4. Parent teen Boundary Negotiation**

- **Work arounds:** (N =54) Child not listening to their parents or working around tech rules via another vehicle, such as borrowing tech from others.
- **Boundary Tensions:** (N=22) Parent/child conflict over tech use, as well as negotiating boundaries

**5. Alternative Perspectives to Parenting Tech**

- **Digital Opportunities:** (N =31) Tech a pathway for future success and safety but also a potential disadvantage for those from cultural/low SES background who may not have access to the latest tech.
- **Social Learning:** (N=20) Using technology in a way that promotes the child's social learning and communication skills

**6. Other Social Ecologies of Support**

- **Extended Family/ Friends' Parents:** (N=12) Extended family of friends' parents helping look out after a child on social media
- **Sibling Influence.** (N=10) Siblings influencing technology use in the home. Involves siblings or other family members helping monitor.
- **School-Related.** (N=6) School-based restrictions and/or tensions between parents and schools regarding tech

**Figure S1.** PRISMA flow diagram of the interdisciplinary systematic review of quantitative survey-based research of digital parenting.

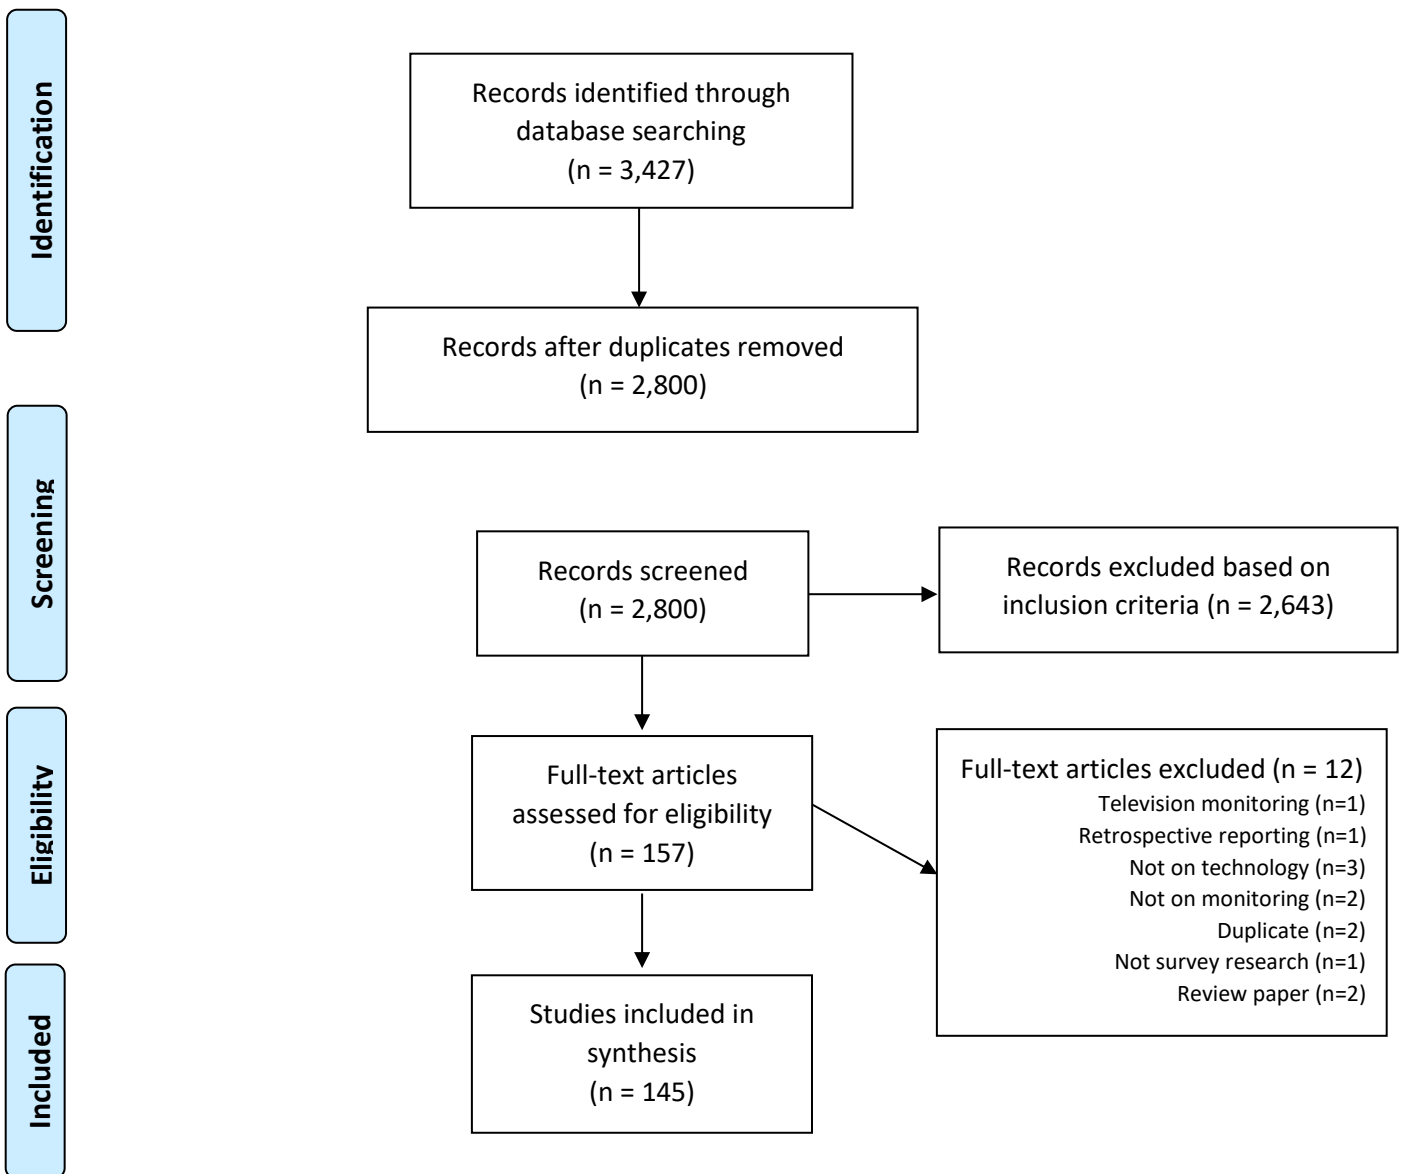

Figure S2. PRISMA flow diagram of the interdisciplinary systematic review of qualitative research of digital parenting.

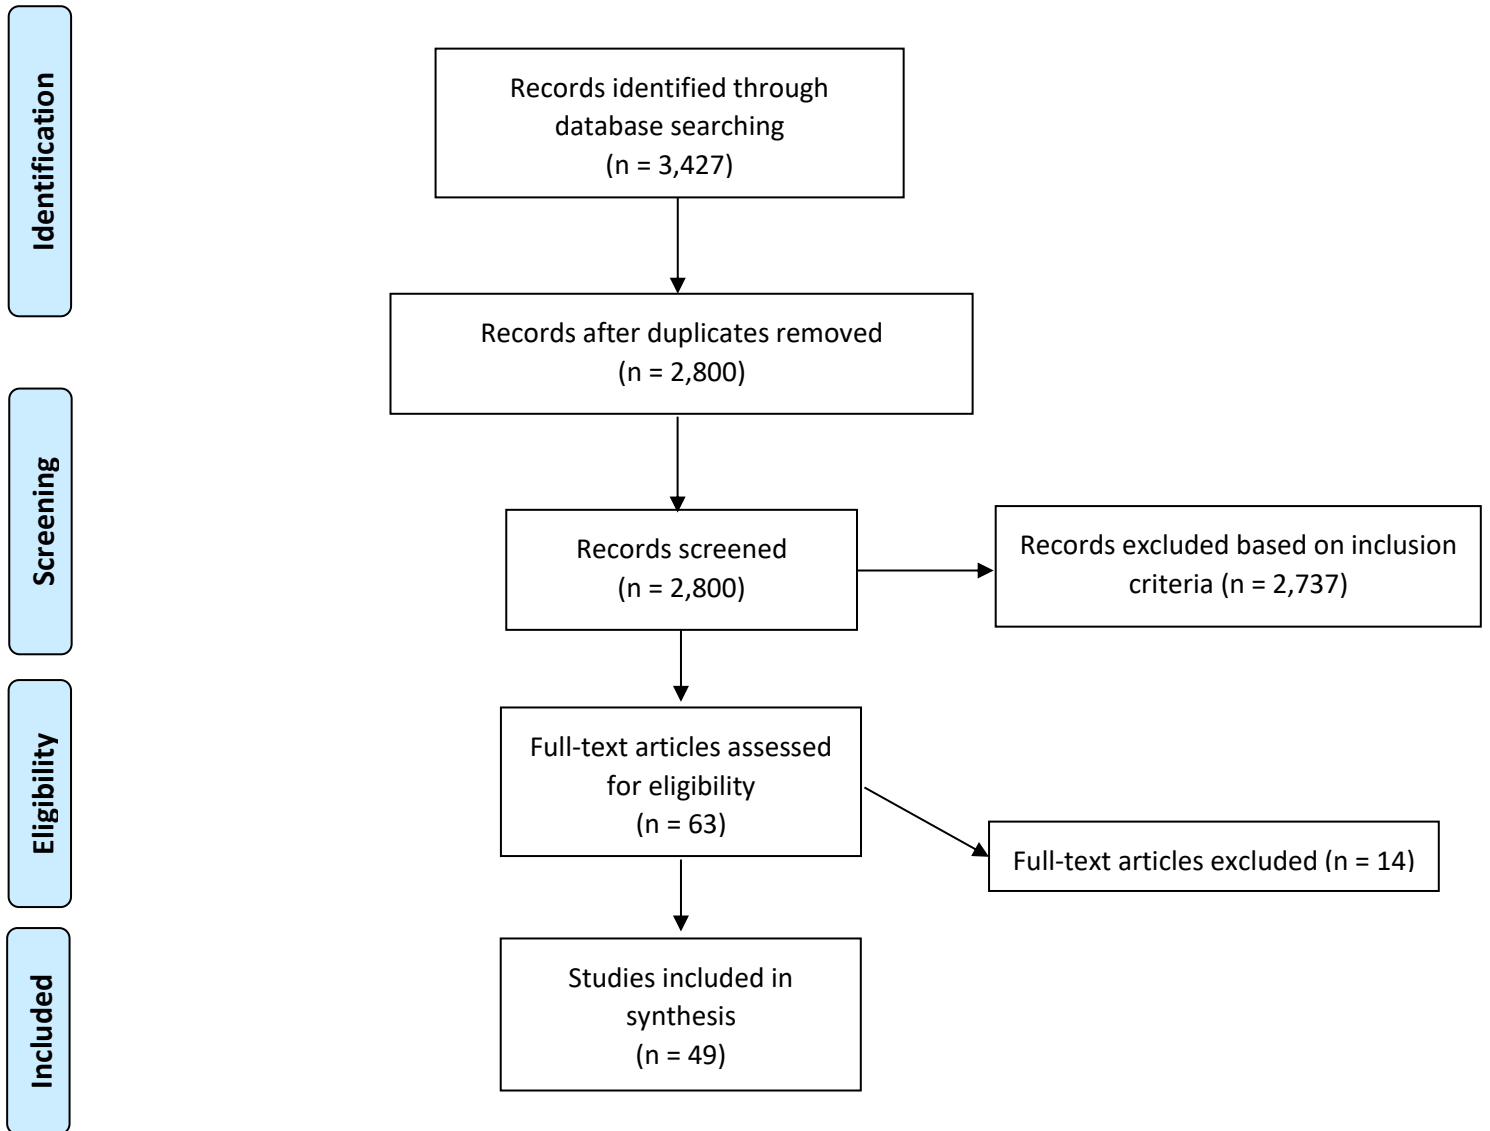

Supplement: sj-pdf-1-pps-10.1177_17456916211072458.pdf [file sj-pdf-1-pps-10.1177_17456916211072458.pdf]
